# Supplementary material for: Enhancing Saccharomyces cerevisiae Taxane Biosynthesis and Overcoming Nutritional Stress-Induced Pseudohyphal Growth
Source: MDPI journal article supplement (doi:10.3390/microorganisms10010163), 2022-01-13
Supplement: s1 [file s1]

**Enhancing *Saccharomyces cerevisiae* taxane biosynthesis**  
**and overcoming nutritional stress induced pseudohyphal**  
**growth – supplementary information**

**Supplementary figures**

**Figure S1: Gas chromatographs resulting from solvent extracts taken from the 2xYP and 2xP cultivations.** A) Solvent blank. B) Extract taken from 2xYP cultivation at 142 hours. Extracts taken from the 2XP cultivation at 71 (C), 79 (D), 119.5 (E) and 142 (F) hours..... 3

**Figure S2: Online BioLector data.** A) Biomass data for each of the 14 media combinations. B) pH values for each of the 14 media combinations. C) Dissolved oxygen values for each of the 14 media combinations. Values are mean  $\pm$  standard deviation for triplicate cultivations. .... 4

**Supplementary tables**

**Table S1: Definitive screening experimental design used to optimise taxane production at microscale.**..... 2

**Table S1: Definitive screening experimental design used to optimise taxane production at microscale.**

| Medium<br>Number | Yeast<br>extract<br>(lot) | Yeast<br>extract<br>(g/L) | Peptone<br>(g/L) | Uracil<br>(mg/L) | Galactose<br>(g/L) | Initial<br>OD <sub>600</sub> |
|------------------|---------------------------|---------------------------|------------------|------------------|--------------------|------------------------------|
| 1                | one                       | 45                        | 45               | 76               | 45                 | 1                            |
| 2                | two                       | 5                         | 5                | 0                | 5                  | 0.1                          |
| 3                | two                       | 25                        | 45               | 0                | 5                  | 1                            |
| 4                | one                       | 25                        | 5                | 76               | 45                 | 0.1                          |
| 5                | two                       | 45                        | 25               | 76               | 5                  | 0.1                          |
| 6                | one                       | 5                         | 25               | 0                | 45                 | 1                            |
| 7                | two                       | 5                         | 45               | 38               | 45                 | 0.1                          |
| 8                | one                       | 45                        | 5                | 38               | 5                  | 1                            |
| 9                | two                       | 5                         | 5                | 76               | 25                 | 1                            |
| 10               | one                       | 45                        | 45               | 0                | 25                 | 0.1                          |
| 11               | two                       | 45                        | 5                | 0                | 45                 | 0.55                         |
| 12               | one                       | 5                         | 45               | 76               | 5                  | 0.55                         |
| 13               | one                       | 25                        | 25               | 38               | 25                 | 0.55                         |
| 14               | two                       | 25                        | 25               | 38               | 25                 | 0.55                         |

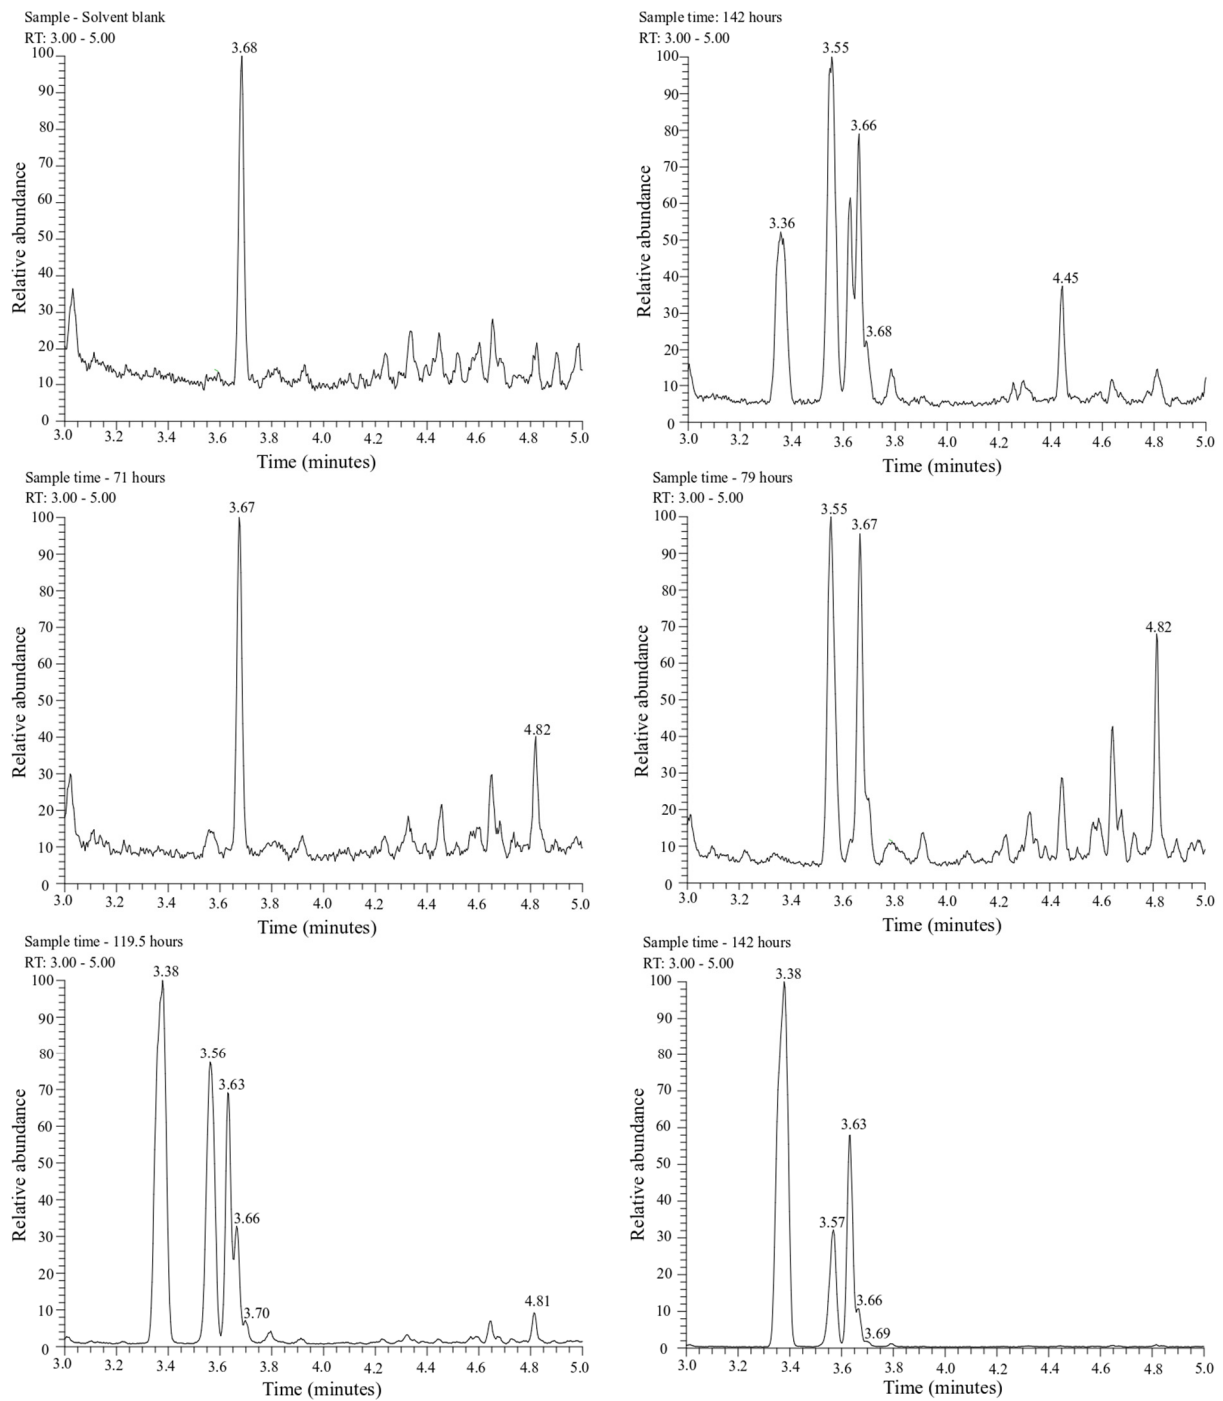

**Figure S1: Gas chromatographs resulting from solvent extracts taken from the 2xYP and 2xP cultivations.** A) Solvent blank. B) Extract taken from 2xYP cultivation at 142 hours. Extracts taken from the 2XP cultivation at 71 (C), 79 (D), 119.5 (E) and 142 (F) hours.

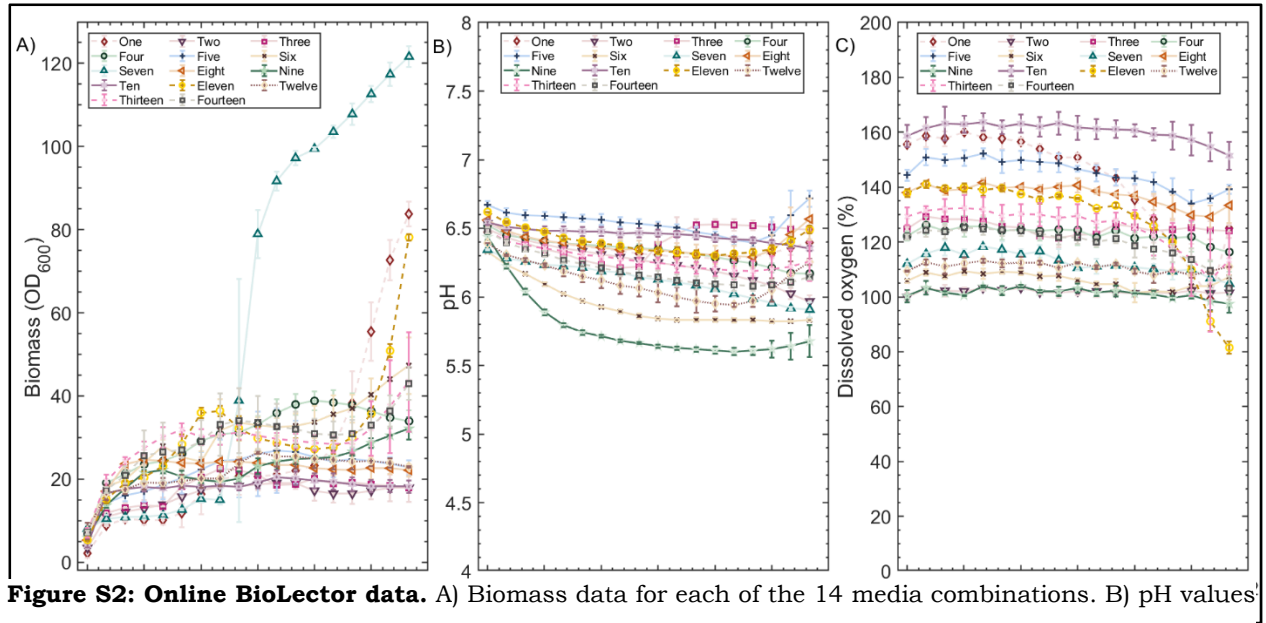

**Figure S2: Online BioLector data.** A) Biomass data for each of the 14 media combinations. B) pH values for each of the 14 media combinations. C) Dissolved oxygen values for each of the 14 media combinations. Values are mean  $\pm$  standard deviation for triplicate cultivations.
